# Supplementary material for: Understanding implementability in clinical trials: a pragmatic review and concept map
Source: Springer Nature journal article supplement (doi:10.1186/s13063-021-05185-w), 2021-03-26
Supplement: MOESM4 [file 19010650]

## Additional File 4: Figure: Supporting resources for each concept

### Understanding implementability in clinical trials: a pragmatic review and concept map

Miranda Cumpston, Steve Webb, Philippa Middleton, Greg Sharplin, Sally Green for the Australian Clinical Trials Alliance Reference Group on Impact and Implementation of CTN Trials.

|                                          | Design                                                              | Resources*                   | Conduct                                              | Resources*     | Reporting                                          | Resources*                   |
|------------------------------------------|---------------------------------------------------------------------|------------------------------|------------------------------------------------------|----------------|----------------------------------------------------|------------------------------|
| Validity                                 | Trial protocol complete                                             | 14 12-3                      | All randomised participants included in ITT analysis | 63,67 40       | Reporting complete                                 | 14,26 28,62 5,56-7           |
|                                          | Team has methodology training & includes a statistician             | 34                           |                                                      |                | Sufficient information to assess risk of bias      | 14,26,34,46 48 3,18,21,28,53 |
|                                          | Protocol uses standardised statistical/analytical procedures        | 34                           |                                                      |                | No selective reporting                             | 29,36                        |
|                                          |                                                                     |                              |                                                      |                | Declaration of interests                           | 14,26 22,30,35,37,54,66      |
| Relevance                                | <i>Design informed by stakeholders &amp; end users</i>              | 4,9,16,17,20,33,45,46,63,65  | Analysis & conclusions meaningful to stakeholders    | 17             | Sufficient information to assess applicability     | 1,14,25,26,39,45,52,61 28,41 |
|                                          | Pragmatic design                                                    | 23,24,59 48 50               |                                                      |                | Information relevant to different stakeholders     | 2,7-8,27,36,43,55,60         |
|                                          | <b>Population</b>                                                   | 34                           |                                                      |                | Rationale for selection/exclusion of harm outcomes | 45                           |
|                                          | Realistic (inclusive of diverse populations & risks)                | 46,49,61,63,67 40,64         |                                                      |                |                                                    | 15                           |
|                                          | Feasible diagnostic/eligibility criteria.                           | 40                           |                                                      |                |                                                    |                              |
|                                          | Actively seeking diversity (for applicability, risk stratification) | 49                           |                                                      |                |                                                    |                              |
|                                          | Sites comparable to where implementation occurs                     | 61,65 40,64                  |                                                      |                |                                                    |                              |
|                                          | <b>Interventions &amp; comparators</b>                              |                              |                                                      |                |                                                    |                              |
|                                          | Feasible & acceptable in current practice & systems                 | 16,46,51,52 8,36             |                                                      |                |                                                    |                              |
|                                          | Intervention as it would be delivered in practice                   | 49,61,67 20,64               |                                                      |                |                                                    |                              |
|                                          | Comparators based in current practice                               | 9,67 7-8,64                  |                                                      |                |                                                    |                              |
|                                          | Evidence of current clinical practice is available                  | 46,67                        |                                                      |                |                                                    |                              |
|                                          | <b>Outcomes</b>                                                     |                              |                                                      |                |                                                    |                              |
|                                          | <i>Important to end users</i>                                       | 9,15,16,17,25,34,38,45,61,63 |                                                      |                |                                                    |                              |
|                                          |                                                                     | 7-8,19,40                    |                                                      |                |                                                    |                              |
| Routine collection                       | 63,65 40                                                            |                              |                                                      |                |                                                    |                              |
| Pragmatic collection                     | 63                                                                  |                              |                                                      |                |                                                    |                              |
| Usability                                | Registered                                                          | 32,34,47                     | Procedures, training & other materials retained      | 25<br>31,42,60 | Published, regardless of outcome                   | 14,32,47 22,48,68            |
|                                          | Protocol published                                                  | 34,47                        |                                                      |                | Accessible to end users                            | 14,32 48                     |
|                                          | Specify theory/logic model of how intervention will work            | 45                           |                                                      |                | Clearly reported                                   | 48                           |
|                                          | <b>Outcomes</b>                                                     |                              |                                                      |                | Sufficient information to replicate                | 25,26,34,45,46 44            |
|                                          | Consent obtained for data re-use                                    | 58                           |                                                      |                | Authors responsive to requests for data            | 10,11,27,31,36,42,43         |
|                                          | Fidelity measures included                                          | 6,45,51,52 11,31,42          |                                                      |                |                                                    | 14,34,47                     |
|                                          | Process information/evaluation/feasibility included                 | 25,45 11,42,43,60            |                                                      |                |                                                    |                              |
| Economic information/evaluation included | 9,25,38,45,46,52 7-8,42,60                                          |                              |                                                      |                |                                                    |                              |

\*Resources refer to the number listed in the Characteristics of Included Resources table (Additional File 3). Resource types: **Guidance**, **Descriptive data (benefit)**, **Descriptive data (problem)**, **Tool**.

Concepts in *italics* have ≥10 supporting resources.
